# Supplementary material for: Attenuated CSF‐1R signalling drives cerebrovascular pathology
Source: PubMed Central journal article supplement (PMC7863388; doi:10.15252/emmm.202012889), 2020-12-22

## Appendix

### Table of Contents

**S1. Cell stress pathway results from variant CSF-1R expressing HEK cells.**

**S2. IHC of control human tissue.**

#### **Appendix Figure S1. Variant CSF-1R does not activate cell stress pathways**

Native and P824R CSF-1R – transfected HEKs analysed using the RT<sup>2</sup> Profiler™ PCR Array Human Stress & Toxicity PathwayFinder. *CXCL8* and *DDIT3* were observed to have a significant 4 and 2-fold downregulation respectively in variant-CSF-1R expressing HEKs.

#### **Appendix Figure S2. IHC of control human cortical tissue.**

A-C IHC of non-demented human cortical vessels for (A) occludin (red), ZO-1 (green), (B) claudin-5 (green), CD68 (red), and (C) GFAP (green). Scale bars indicate 20 µm (A, B) and 50 µm (C).

# Appendix Figure S1

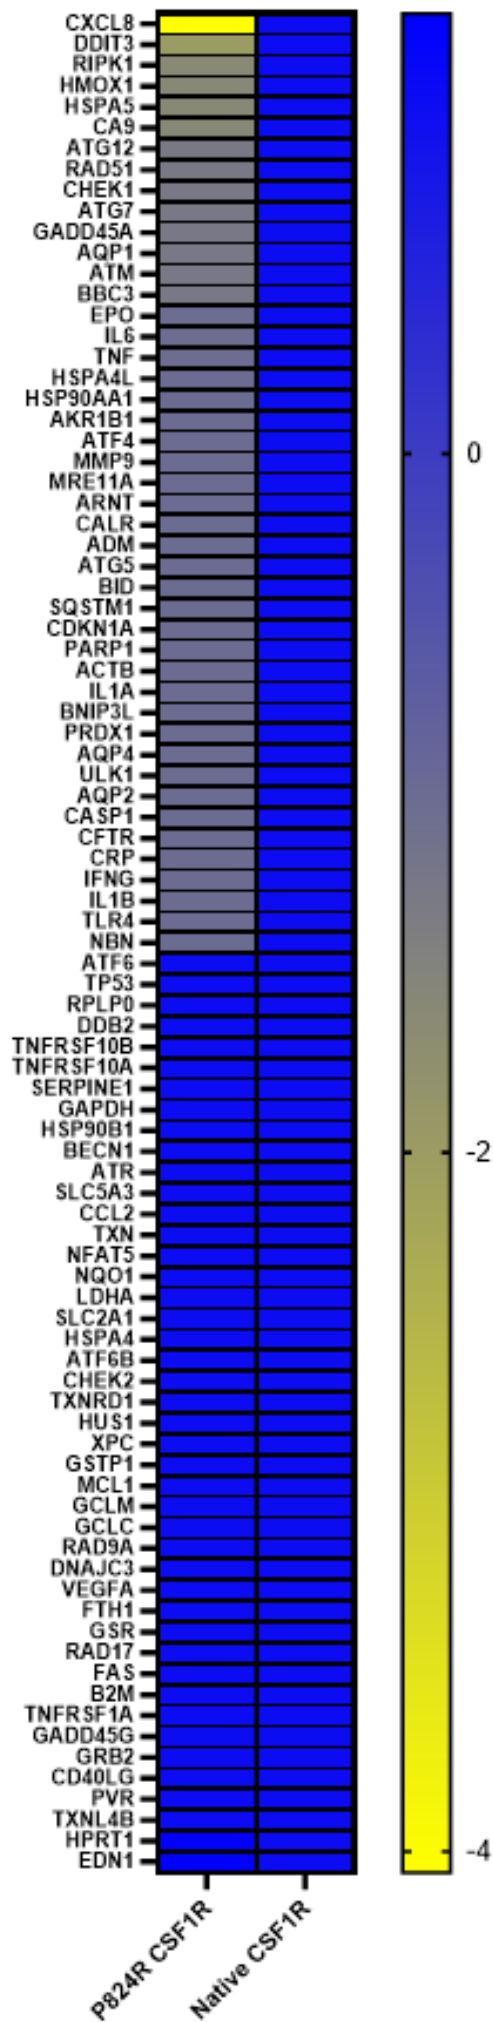

# Appendix Figure S2

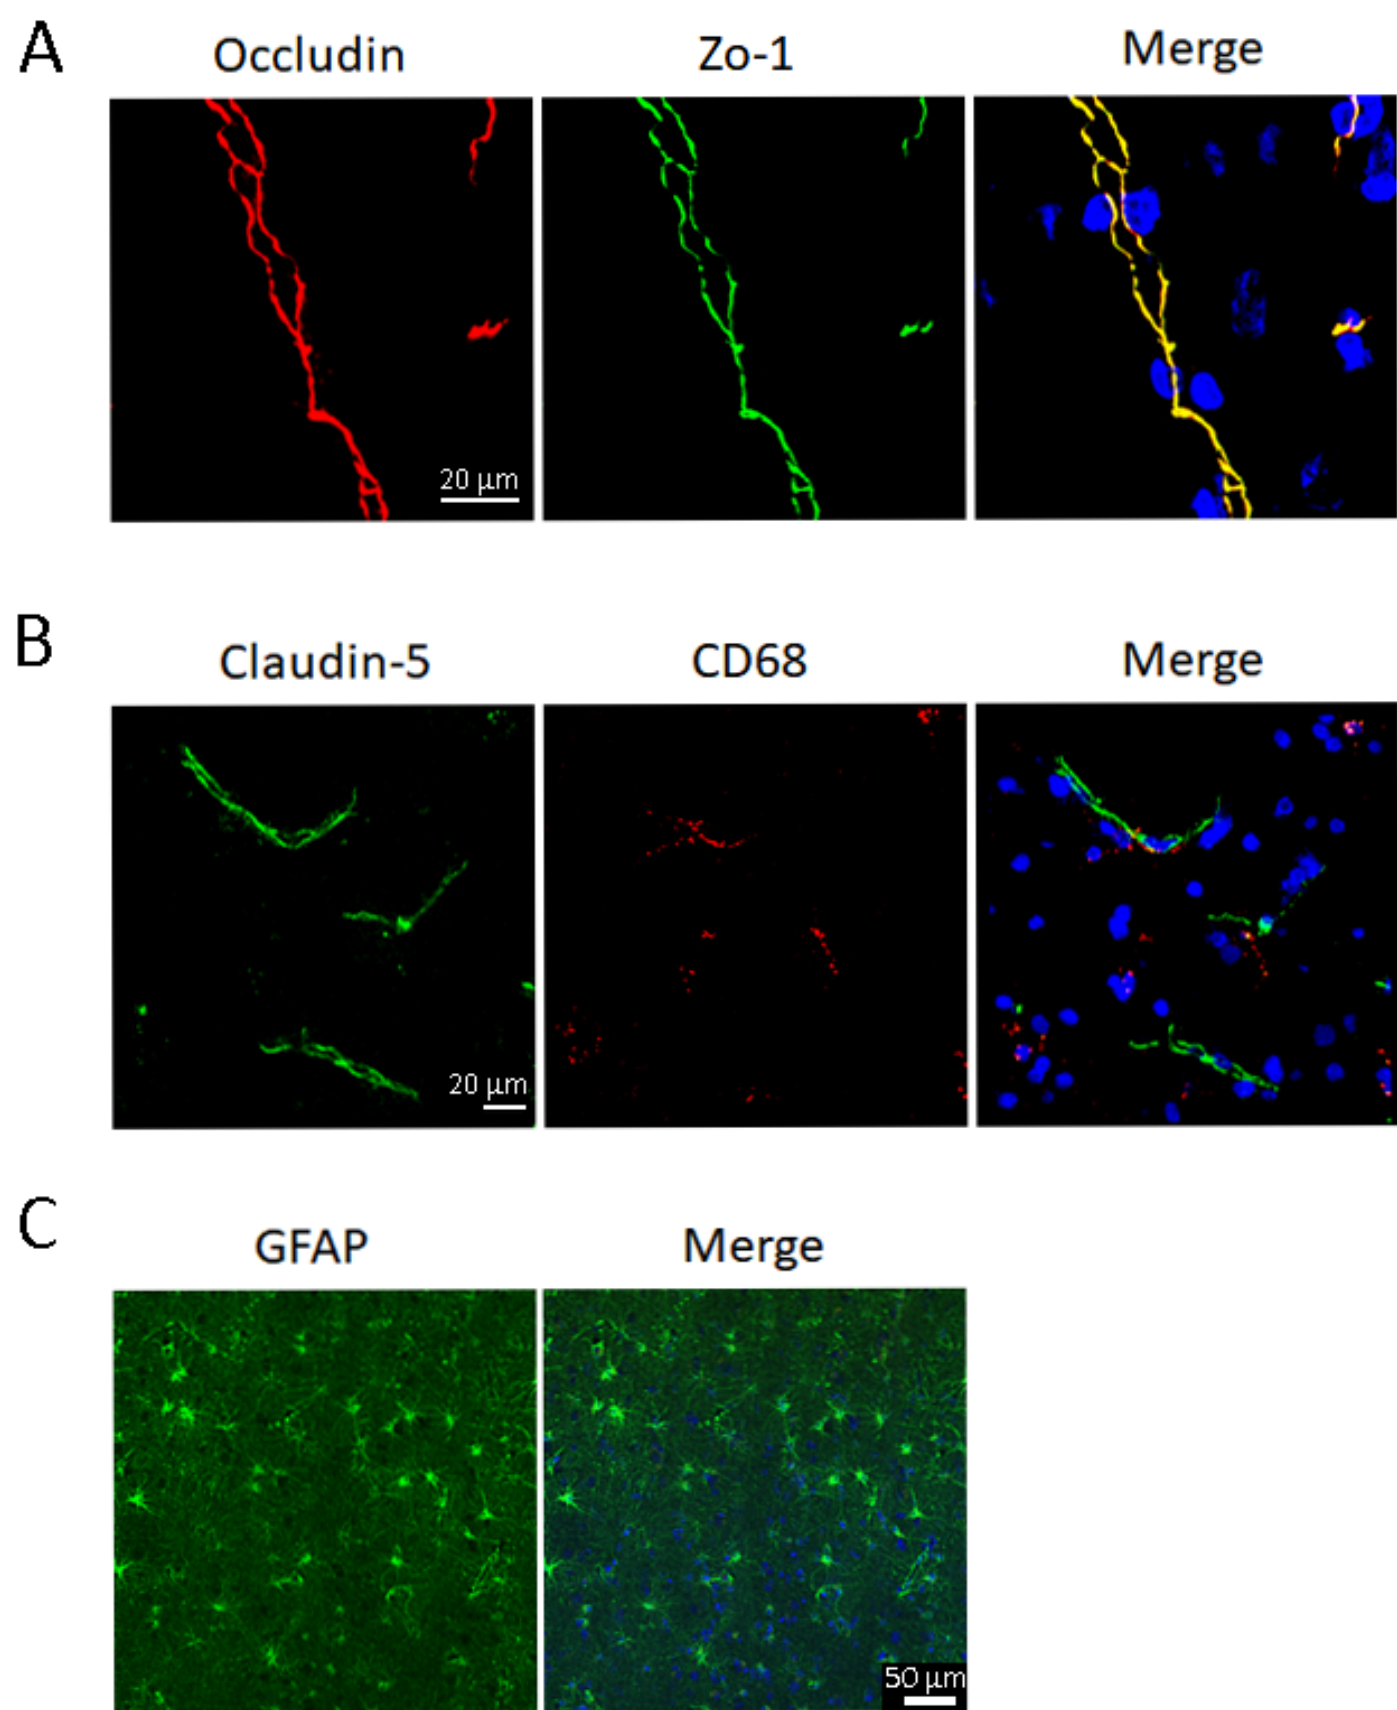

Supplement: EMMM-13-e12889-s001.pdf [file EMMM-13-e12889-s001.pdf]
