# Supplementary material for: Attenuated CSF‐1R signalling drives cerebrovascular pathology
Source: EMBO Mol Med. 2020 Dec 22;13(2):e12889. doi: 10.15252/emmm.202012889 (PMC7863388; doi:10.15252/emmm.202012889)
Supplement: Supplementary file 2 — Expanded View Figures PDF [file EMMM-13-e12889-s002.pdf]

## Expanded View Figures

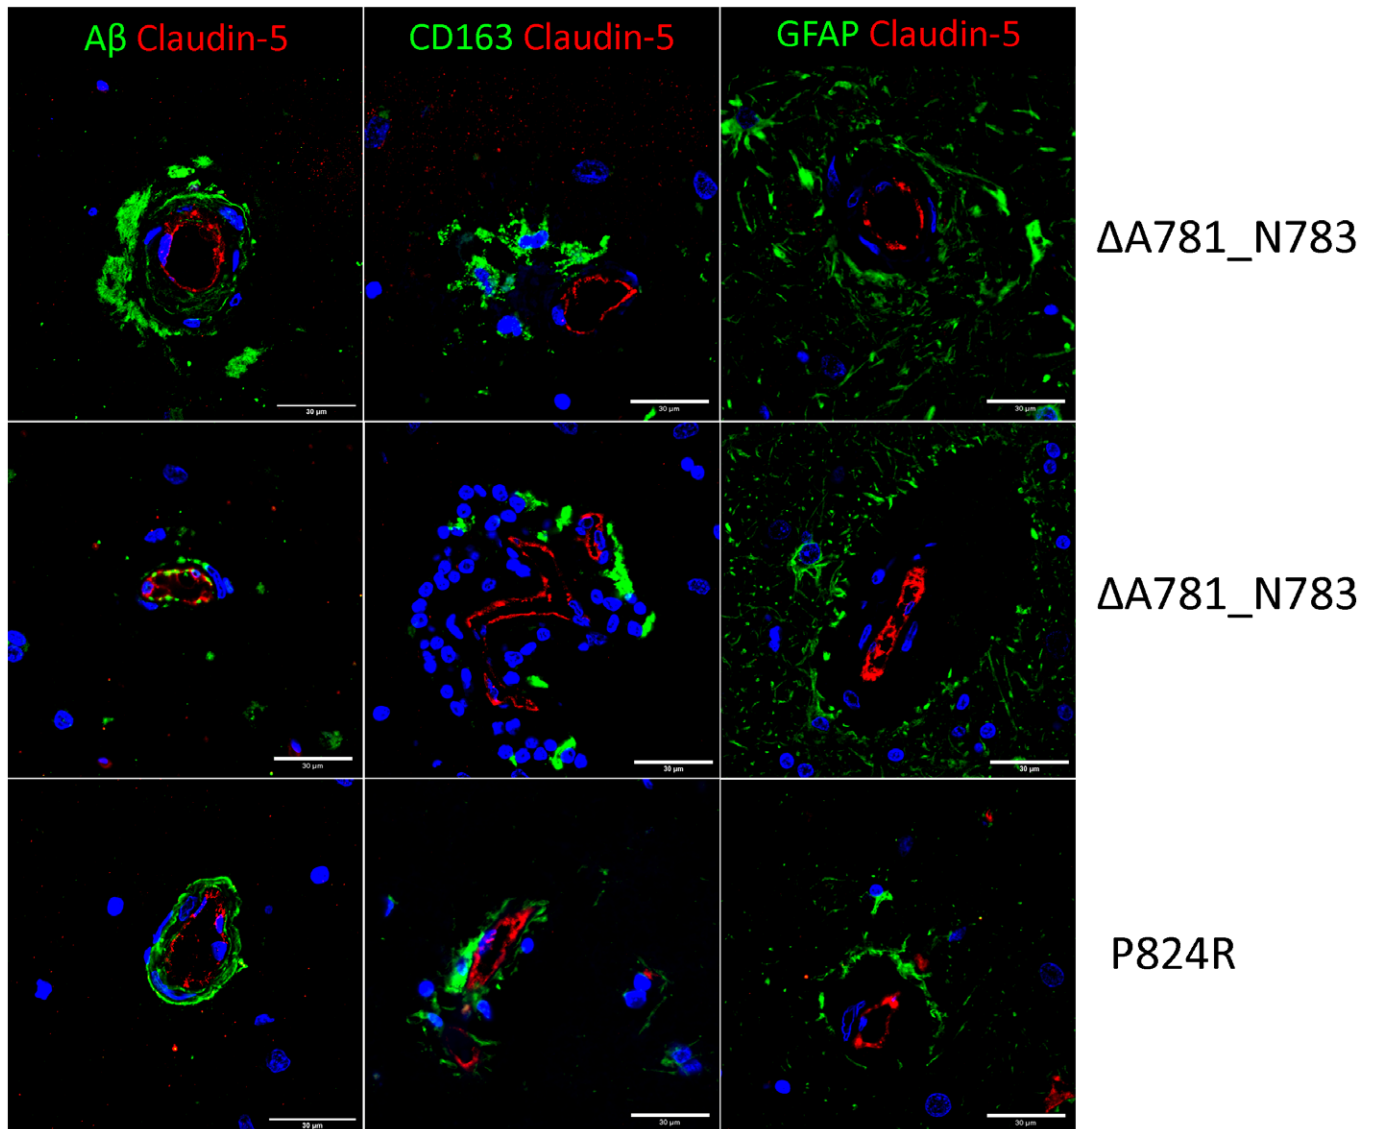

**Figure EV1. IHC of individual ALSP brain sections.**

IHC of individual ALSP patient post-mortem tissue for amyloid-β (green) and CLD5 (red), GFAP (green) and CLD5 (red), CD163 (green) and CLD5 (red). Note that claudin-5/GFAP images and claudin-5/CD163 images are the same as those shown in Fig 6C and F and are shown here again for ease of comparison. Scale bars indicate 30 μm.

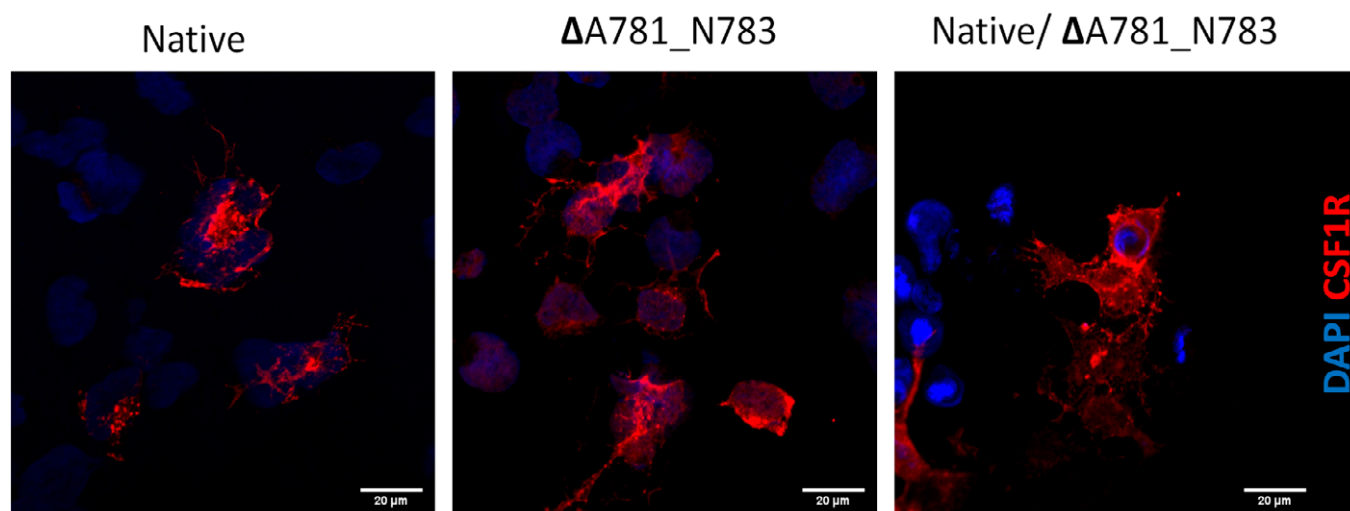

**Figure EV2. Immunocytochemistry of CSF-1R expressing HEK293 cells.**

ICC for CSF-1R (red) and DAPI (blue) showing membrane localisation of both native and variant CSF-1R. Scale bars indicate 30  $\mu$ m.

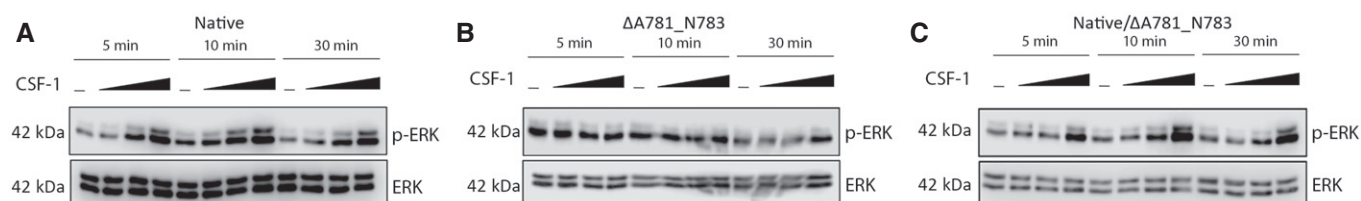

**Figure EV3. Restoration of variant CSF-1R levels does not restore function.**

A–C qPCR of wild type (blue) or *Csf1r*<sup>+/-</sup> (red) endothelial cells treated with control, *Csf1r*<sup>+/-</sup> MCM or *Csf1r*<sup>+/-</sup> MCM. Statistical analyses of inter-genotype changes. (\**P* < 0.05, \*\**P* < 0.005, \*\*\**P* < 0.0008, \*\*\*\**P* < 0.0001. Scatter plots represent technical replicates of *n* = 2 independent primary cell isolations and microglia conditionings, two-way ANOVA with multiple comparisons and Sidak's post-test, error bars indicate SEM). Western blot for phosphorylated and total ERK in HEK293 cells transfected with (A) native CSF-1R, (B)  $\Delta$ A781\_N783 CSF-1R or (C) both native and  $\Delta$ A781\_N783 CSF-1R. Cells were treated with MG132 for 1 h, followed by treatment with CSF1 for 10 min. Horizontal line indicates untreated cells, with increasing concentrations 10, 50 and 100 ng/ml CSF1.

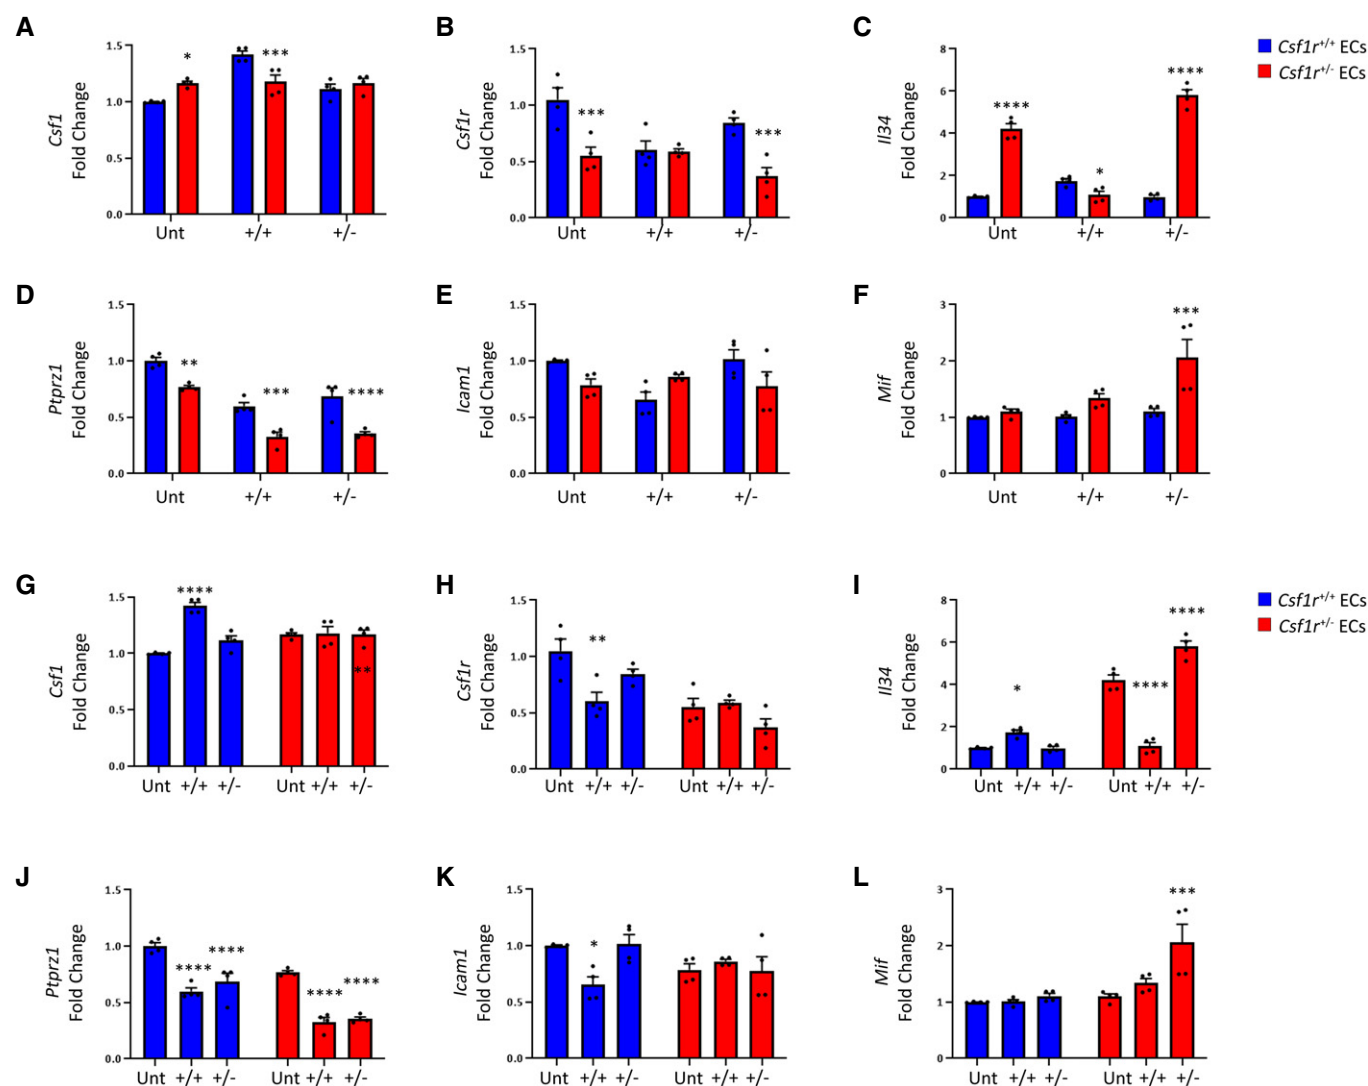

**Figure EV4. Transcriptional changes in the CSF-1R pathway of MCM-treated ECs.**

A–F qPCR of wild type (blue) or *Csf1r*<sup>+/−</sup> (red) endothelial cells treated with control, *Csf1r*<sup>+/+</sup> MCM or *Csf1r*<sup>+/−</sup> MCM. Statistical analyses of inter-genotype changes. (\**P* < 0.05, \*\**P* < 0.005, \*\*\**P* < 0.0008, \*\*\*\**P* < 0.0001. Scatter plots represent technical replicates of *n* = 2 independent primary cell isolations and microglia conditionings, two-way ANOVA with multiple comparisons and Sidak's post-test, error bars indicate SEM).

G–L qPCR of wild type (blue) or *Csf1r*<sup>+/−</sup> (red) endothelial cells treated with control, *Csf1r*<sup>+/+</sup> MCM or *Csf1r*<sup>+/−</sup> MCM. Statistical analyses of changes relative to respective untreated control. (\**P* < 0.05, \*\**P* < 0.008, \*\*\**P* < 0.0008, \*\*\*\**P* < 0.0001. Scatter plots represent technical replicates of *n* = 2 independent primary cell isolations and microglia conditionings, two-way ANOVA with multiple comparisons and Sidak's post-test, error bars indicate SEM).

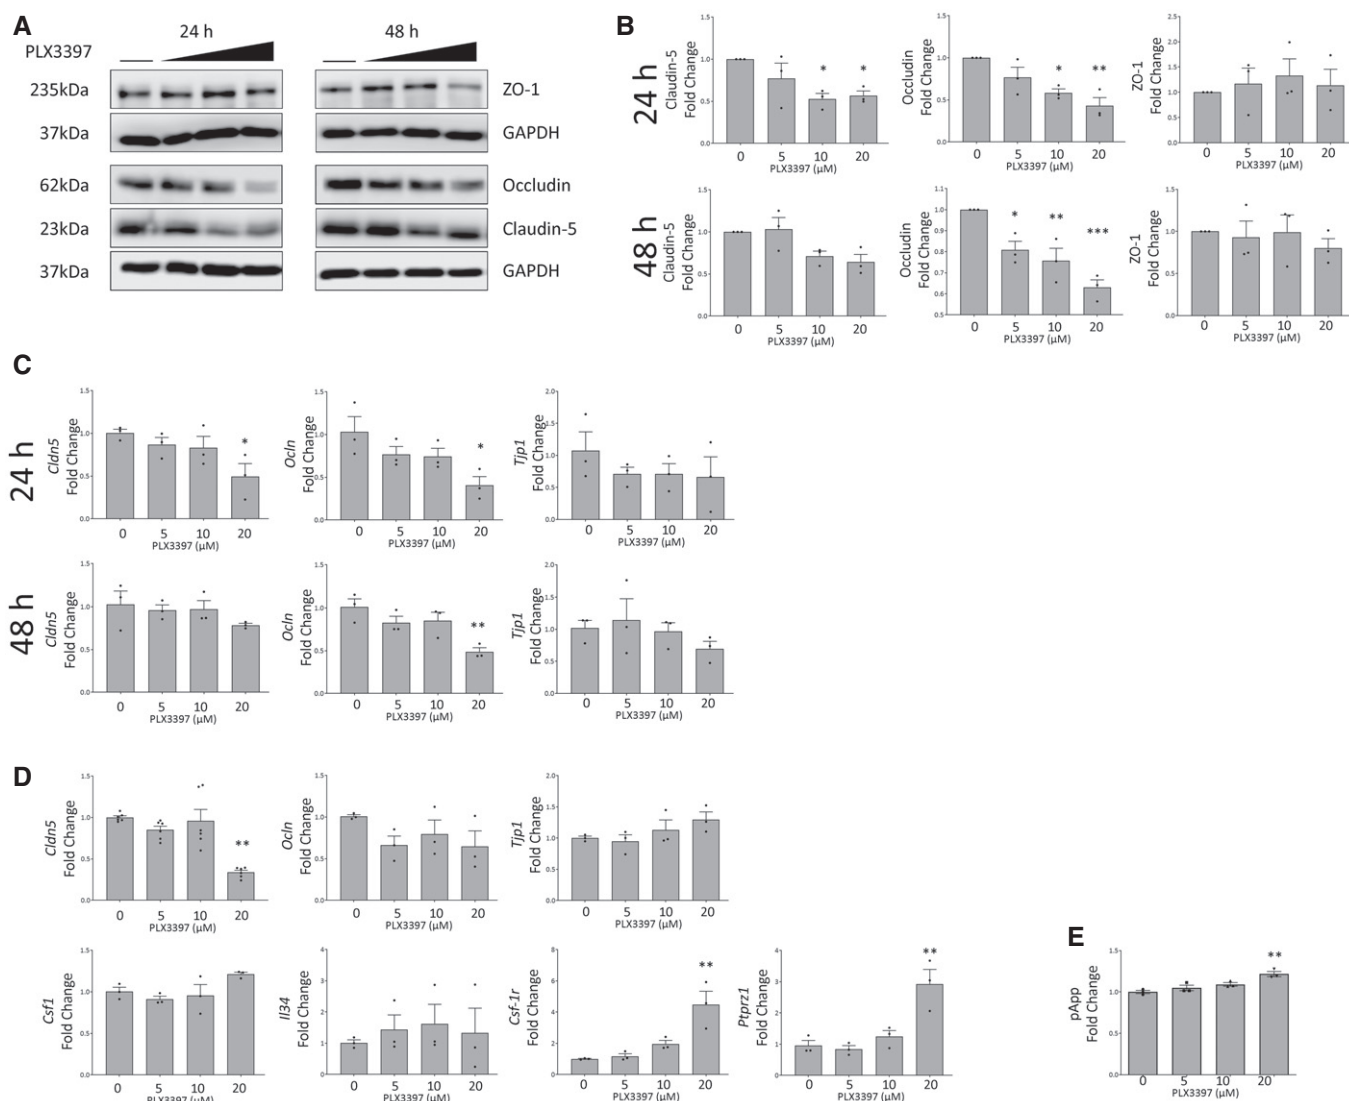

**Figure EV5. PLX3397 reduces tight junction expression.**

A, B Western blot of lysates from PLX3397 treated b.End3 cells for tight junction proteins ZO-1, Occludin and Claudin-5 (A). The horizontal line indicates untreated cells, with increasing PLX3397 concentrations (5, 10, 20  $\mu$ M). Corresponding densitometry is given in (B). (One-way ANOVA with Dunnett's post-test for multiple comparisons,  $^*P < 0.05$ ,  $^{**}P < 0.005$ ,  $^{***}P < 0.0005$ ,  $n = 3$  independent experiments, error bars indicate SEM)

C Gene expression changes at 24 (top) and 48 (bottom) h in PLX3397 treated b.End3 cells shown by qPCR for *Tjp1*, *Occludin* and *Cldn5* ( $^*P < 0.05$ ,  $^{**}P < 0.006$ ,  $n = 3$  independent experiments one-way ANOVA with Dunnett's post-test, error bars indicate SEM).

D qPCR analysis of tight junction and CSF-1R pathway gene expression changes at 24 h in PLX3397 treated MBECs (one-way ANOVA with Dunnett's post-test for multiple comparisons,  $^{**}P < 0.009$ ,  $n = 3$  independent experiments, error bars indicate SEM).

E FITC-4kDa transwell permeability assay of primary mouse microvascular endothelial cells (MBECs) treated for 24 h with PLX3397 at indicated doses (one-way ANOVA with Dunnett's correction,  $n = 3$  technical replicates for flux assay, one-way ANOVA with Dunnett's post-test for multiple comparisons,  $^{**}P = 0.0012$ , error bars indicate SEM).
